# Supplementary material
Source: publisher site journal article supplement (https://www.dovepress.com/article/340158)
Supplement: Supplementary file 1 [file get_supplementary_file.php]

| **Child name:** | **Land line no. :** | | **Mobile no. :** |
| --- | --- | --- | --- |
| **Date of birth:** | | | **Age:** |
| **Nationality:** | | | |
| **Gender: 1🞎Male 2🞎Female** | | | |
| **Home Address:** | | | **city:** |
| The Behavioral management | | 1. Nitrous Oxide sedation 2. Papoose Board 3. Papoose Board+ Nitrous Oxide 4. Papoose Board+ Chloral hydrate 5. General Anesthesia | |

**Supplementary material 1: Questionnaire**

Prevalence and Parental attitude toward Nitrous-oxide and Papoose-board use in Two Dental Referral Centers in Saudi Arabia: A Cross-sectional Study

**SECTION-1: Sociodemographic data:**

| **Mother Age:** | **Father Age:** |
| --- | --- |
| **Mother education level**  1🞎illiterate  2🞎Primary/intermediate  3🞎High school  4🞎 University degree and higher | **Father education level**  1🞎illiterate  2🞎Primary/intermediate  3🞎High school  4🞎 University degree and higher |
| **Mother profession:**  1🞎Housewife  2🞎Private sector  3🞎Government sector  4🞎 Teacher  5🞎 Retired | **Father profession:**  1🞎Military  2🞎Private sector  3🞎Government sector  4🞎 Teacher  5🞎 Retired |
| **Family income/month** 1🞎Less than 7000 SAR 2🞎7000-10000 SAR  3🞎10000-16000 SAR 4🞎more than 16000 SAR | |
| **How many children do you have?**  1🞎1-2children 2🞎 3-5 children or less 3🞎 6 to 9 children 4🞎 ≥10 children | |

**SECTION-2: Parental attitude toward the N2O and/or BB**

| **Did your child receive any dental treatment before this behavior method?**  1🞎: Yes 2🞎: No |
| --- |
| **If yes,**  **What was the behavior method used during the previous dental treatment?**  1🞎Nothing 2🞎Voice control 3🞎holding the hands  4🞎N2O 5🞎GA 6🞎Papoose  **How was your experience for that behavior management method?**  1🞎: Satisfactory  2🞎: Not satisfactory |
| **Did any of his/her siblings undergo dental treatment under general anesthesia/papoose/N2O?**  1🞎: Yes 2🞎: No What type________  **If yes,**  **cause**(s): 1🞎: Rampant caries 2🞎: Behavioral problem 3🞎: Medical Problem 4🞎: Parental preference  **How do you find the dental treatment under GA/Sedation/Papoose experience?**  1🞎: Satisfactory  2🞎: Not satisfactory  **How did you feel before using this type of behavior management method?**  1🞎: Satisfactory  2🞎: Not satisfactory |
| **How do you find the dental treatment under GA/Sedation/Papoose experience?**  1🞎: Satisfactory  2🞎: Not satisfactory |
| **If any of your other children needs dental treatment; would you like to treat him in the dental clinic (several visits) or again under general anesthesia/Sedation/Papoose?**  1🞎: Under general anesthesia/Sedation/Papoose  2🞎: Several visits |

**Notes**

**Dear Parent ,**

**If you have any notes related to dental treatment under general anesthesia/N2O?papoose, you can write it here.**
